# Supplementary material for: A crosslinked network polypyrrole coated cobalt doped Fe2O3@carbon cloth flexible anode material for quasi-solid asymmetric supercapacitors
Source: Royal Society of Chemistry journal article supplement (doi:10.1039/d3dt01821k), 2023-01-01
Supplement: d3dt01821k1.pdf [file d3dt01821k1.pdf]

## Supporting Information

### **Cross-linked network polypyrrole coating cobalt doped Fe<sub>2</sub>O<sub>3</sub>@carbon cloth flexible anode material for quasi-solid asymmetric supercapacitors**

Zhiwei Li <sup>1</sup>, Minglong Li <sup>1</sup>, Xiaodong Wang <sup>2</sup>, Ning Fu <sup>\*,3</sup>, Zhenglong Yang <sup>\*,1</sup>

*<sup>1</sup>Key Laboratory of Advanced Civil Engineering Materials of Ministry of Education,  
School of Materials Science and Engineering, Tongji University, Shanghai 200092, P.  
R. China;*

E-mail: yangzhenglong@tongji.edu.cn

*<sup>2</sup>Shanghai Key Laboratory of Special Artificial Microstructure Materials and  
Technology & School of Physics Science and Engineering, Tongji University,  
Shanghai 200092, P. R. China;*

<sup>3</sup>School of Chemical and Environmental Engineering, Anyang Institute of Technology  
Anyang 455000, P. R. China.

E-mail: funing@ayit.edu.cn

*\* Corresponding authors.*

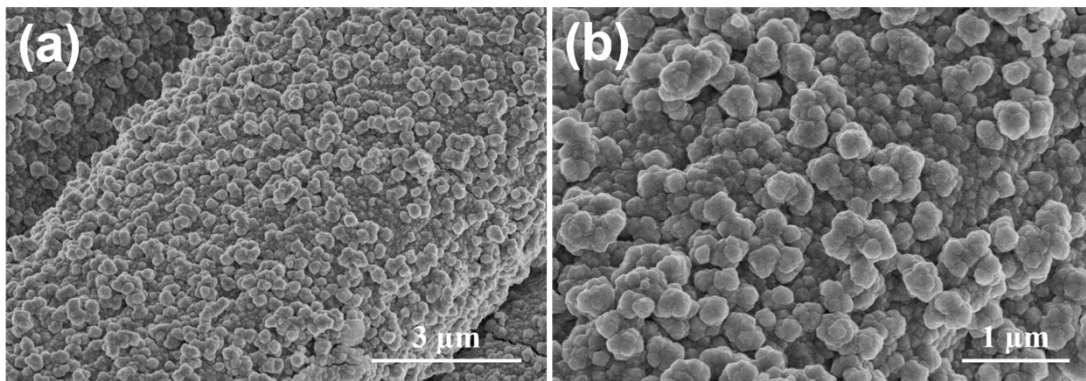

**Figure S1.** (a, b) SEM image of Co-Fe<sub>2</sub>O<sub>3</sub>@CC.

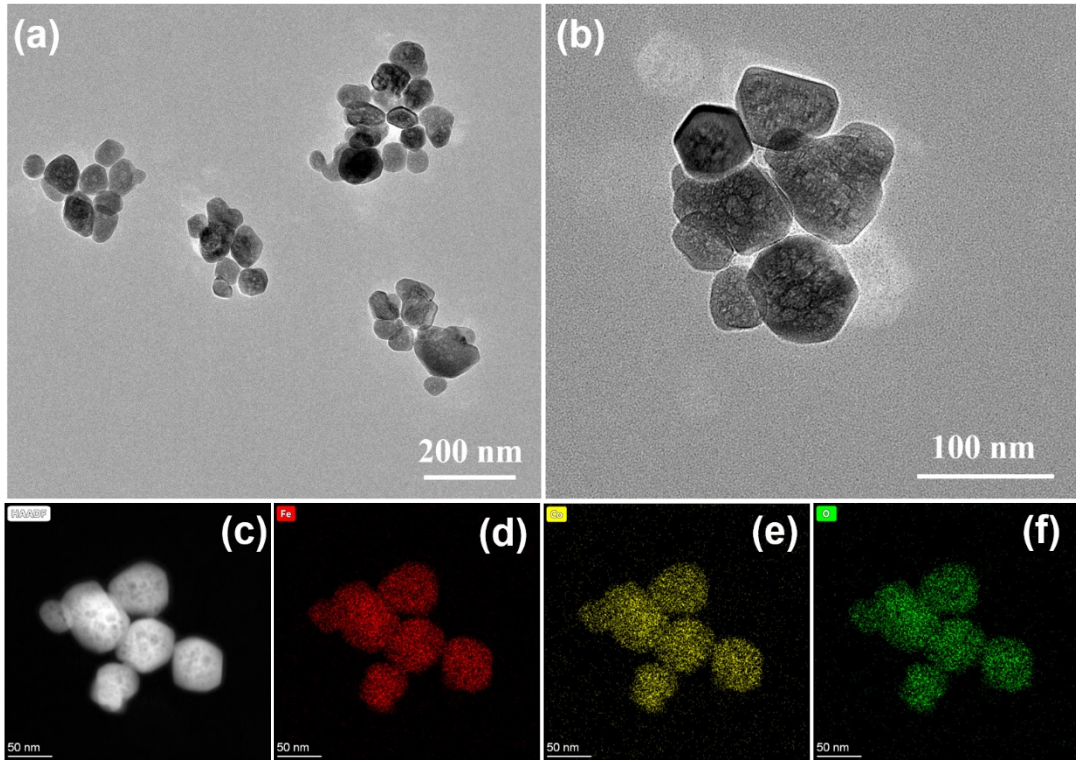

**Figure S2.** (a, b) TEM image, (c-f) EDS mapping of Co-Fe<sub>2</sub>O<sub>3</sub>@CC.

To further illustrate the structural changes of Co doping, we adopted MDI Jade cell refinement to analysis the XRD results. **Table S1** and **Table S2** displayed the change in cell parameters.

**Table S1.** Indexing of Fe<sub>2</sub>O<sub>3</sub> with hexagonal structure (R-3c(167): a=b=5.020Å, c=13.847Å, ρ=5.2647 g/cm<sup>3</sup>). (h k l): Possible reflection of a given unit cell; 2Theta(cal): Calculated angular; 2Theta(obs): Observed angular; Delta: 2Theta(cal)-2Theta(obs); d(cal): Calculated d-spacing; d(obs): Observed d-spacing; I%: relative percentage. (The table only lists some representative parameters)

| (h k l) | 2Theta(cal) | 2Theta(obs) | Delta  | d(cal) | d(obs) | Del-d   | I%   |
|---------|-------------|-------------|--------|--------|--------|---------|------|
| (1 0 4) | 33.051      | 33.212      | -0.161 | 2.7080 | 2.6953 | 0.0128  | 100  |
| (1 1 0) | 35.743      | 35.717      | 0.026  | 2.5100 | 2.5118 | -0.0018 | 62.3 |
| (1 1 3) | 40.892      | 40.928      | -0.036 | 2.2050 | 2.2032 | 0.0018  | 21.9 |
| (0 2 4) | 49.471      | 49.516      | -0.045 | 1.8409 | 1.8393 | 0.0016  | 35.1 |
| (1 1 6) | 53.926      | 54.082      | -0.156 | 1.6988 | 1.6943 | 0.0045  | 54.8 |
| (0 1 8) | 57.242      | 57.521      | -0.279 | 1.6081 | 1.6009 | 0.0071  | 7.7  |
| (2 1 4) | 62.518      | 62.484      | 0.033  | 1.4844 | 1.4851 | -0.0007 | 29.2 |
| (3 0 0) | 64.219      | 64.038      | 0.181  | 1.4492 | 1.4528 | -0.0036 | 23.8 |

**Table S2.** Indexing of Co-Fe<sub>2</sub>O<sub>3</sub> with hexagonal structure (R-3c(167): a=b=5.028Å, c=13.746Å, ρ=5.2855 g/cm<sup>3</sup>). (h k l): Possible reflection of a given unit cell; 2Theta(cal): Calculated angular; 2Theta(obs): Observed angular; Delta: 2Theta(cal)-2Theta(obs); d(cal): Calculated d-spacing; d(obs): Observed d-spacing; I%: relative percentage. (The table only lists some representative parameters)

| (h k l) | 2Theta(cal) | 2Theta(obs) | Delta  | d(cal) | d(obs) | Del-d   | I%   |
|---------|-------------|-------------|--------|--------|--------|---------|------|
| (1 0 4) | 33.181      | 33.213      | -0.032 | 2.6977 | 2.6952 | 0.0025  | 100  |
| (1 1 0) | 35.682      | 35.724      | -0.041 | 2.5142 | 2.5113 | 0.0028  | 66.4 |
| (1 1 3) | 40.909      | 40.933      | -0.024 | 2.2042 | 2.2029 | 0.0013  | 22.5 |
| (0 2 4) | 49.518      | 49.511      | 0.007  | 1.8393 | 1.8395 | -0.0002 | 38.9 |
| (1 1 6) | 54.113      | 54.096      | 0.017  | 1.6934 | 1.6939 | -0.0005 | 55.4 |
| (0 1 8) | 57.621      | 57.571      | 0.050  | 1.5984 | 1.5996 | -0.0013 | 8.6  |
| (2 1 4) | 62.517      | 62.500      | 0.017  | 1.4844 | 1.4848 | -0.0004 | 28.2 |
| (3 0 0) | 64.100      | 64.061      | 0.040  | 1.4515 | 1.4524 | -0.0008 | 24   |

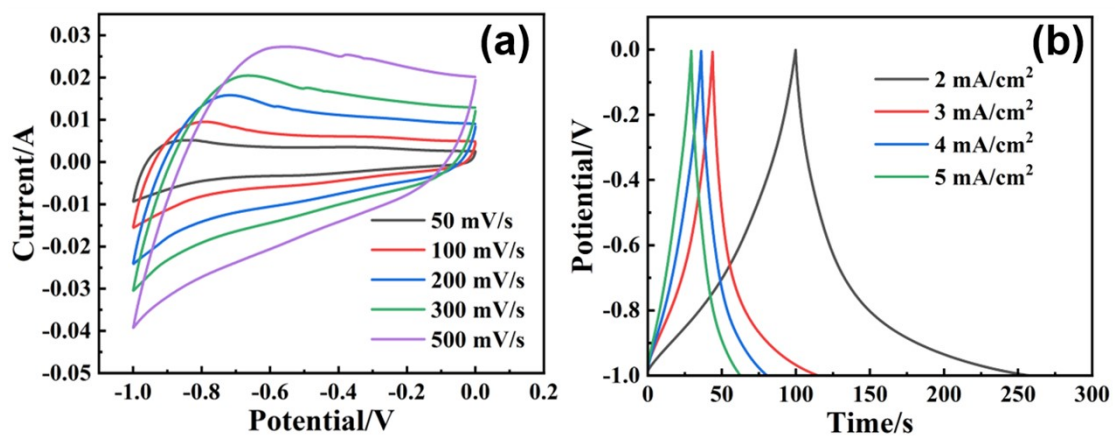

**Figure S3.** (a) Constant current charge and discharge curves of Co-Fe<sub>2</sub>O<sub>3</sub>@CC at different current densities, (b) Cyclic voltammetry curves of Co-Fe<sub>2</sub>O<sub>3</sub>@CC at different scanning speeds.
